# Supplementary material for: Biomass-derived hard carbon anodes with enhanced capacity for sodium-ion batteries
Source: Royal Society of Chemistry journal article supplement (doi:10.1039/d5dt02082d), 2025-11-26
Supplement: d5dt02082d1.pdf [file d5dt02082d1.pdf]

## Supporting Information

### Biomass-Derived Hard Carbon Anodes with Enhanced Capacity for Sodium-Ion Batteries

Huahua Zeng<sup>a#</sup>, Juntao He<sup>a#</sup>, Jinlian Zhang<sup>a</sup>, Qinxuan Zeng<sup>a,b</sup>, Ning Li<sup>c</sup>, Ming Sun<sup>a,b\*</sup>,  
Lin Yu<sup>a,b</sup>

<sup>a</sup>Guangdong Engineering Technology Research Center of Modern Fine Chemical Engineering, Guangdong Provincial Key Laboratory of Plant Resources Biorefinery, School of Chemical Engineering and Light Industry, Guangdong University of Technology, Guangzhou 510006, China

<sup>b</sup>Jieyang Branch of Chemistry and Chemical Engineering Guangdong Laboratory (Rongjiang Laboratory), Jieyang 515200, China

<sup>c</sup>College of Chemical Engineering, Guangdong University of Petrochemical Technology, Maoming 525000, China

# these two authors contributed equally

\*To whom correspondence should be addressed: sunmgz@gdut.edu.cn;

## 1. Experimental

### 1.1 Physical Characterization

Thermogravimetric analysis (TG Perkin Elmer) was performed to obtain the thermal stability data of the materials. The morphological features of the materials were observed using scanning electron microscopy (SEM, Phenom-world) and Higher resolution transmission electron microscopy (HRTEM, FEI Thermo). Specific surface area and other parameters were determined by nitrogen adsorption-desorption analysis (Quantachrome ASiQwin). The crystalline structure of the materials was investigated using X-ray diffraction (XRD Cu K $\alpha$ ,  $\lambda = 1.54056 \text{ \AA}$ ) and Raman spectroscopy (Rman LabRam HR Evolution). X-ray photoelectron spectroscopy (XPS Thermo Fisher) was employed to analyze the surface elemental composition of the materials. The total nitrogen content in both LHC and NLHC were measured by Organic

Element Analyzer (German, Elementar UNICUBE).

## 1.2 Electrochemical test

### 1.2.1 Half-Cell Performance Test

The electrochemical performance of the active materials was evaluated using CR2032 coin cells. The active material and polyvinylidene fluoride (PVDF) were mixed in a mass ratio of 8:2 and dispersed in N-methylpyrrolidone (NMP) to form a homogeneous slurry. The slurry was uniformly coated on carbon-coated aluminum foil using a spatula and then dried in a vacuum drying chamber at 60 °C for 12 h (The active mass loading in the electrode sheet is *ca.* 2 mg cm<sup>-2</sup>). The coated foil was cut into circular electrodes with a diameter of 10 mm. Sodium metal was used as the counter electrode, and a glass fiber membrane (Whatman GF/D) served as the separator. The electrolyte was 1 M NaPF<sub>6</sub> in diglyme. The coin cells were assembled in an argon-filled glovebox (H<sub>2</sub>O < 0.1 ppm, O<sub>2</sub> < 0.1 ppm). Cyclic voltammetry (CV) and electrochemical impedance spectroscopy (EIS) measurements were conducted using a CHI electrochemical workstation. Galvanostatic charge-discharge (GCD) testing, rate performance testing, long-term cycling testing, and galvanostatic intermittent titration technique (GITT) testing were performed using a LAND CT2001A battery testing system.

### 1.2.2 Full-Cell Performance Test

Negative electrode preparation: The active material and polyvinylidene fluoride (PVDF) were mixed in a mass ratio of 8:2 and dispersed in NMP to form a homogeneous slurry. The slurry was uniformly coated on copper foil using a spatula and dried in a vacuum drying chamber at 60 °C for 12 h. The coated foil was cut into circular negative electrodes with a diameter of 10 mm. Sodium metal was used as the counter electrode to assemble CR2032 coin cells, and the negative electrode was activated by cycling at 30 mA g<sup>-1</sup> for 3 cycles. After activation, the negative electrode was removed from the coin cell in the glovebox and stored for later use.

Positive electrode preparation: Commercial Na<sub>3</sub>V<sub>2</sub>(PO<sub>4</sub>)<sub>3</sub> (NVP) was used as the active material for the positive electrode. NVP and PVDF were mixed in a mass ratio

of 8:2, and an appropriate amount of NMP was added and ground for 1 h to form a viscous, particle-free slurry. The slurry was uniformly coated on aluminum foil using a spatula and dried in a convective drying oven at 60 °C. The electrode was then cut into circular positive electrodes with a diameter of 14 mm and further dried in a vacuum drying chamber at 60 °C for 12 h.

The CR2032 coin cell was assembled in the following order: negative electrode casing, negative electrode, electrolyte, GF/D separator, electrolyte, positive electrode, spacer, spring, and positive electrode casing. The electrolyte used was 1 M NaPF<sub>6</sub> in diglyme.

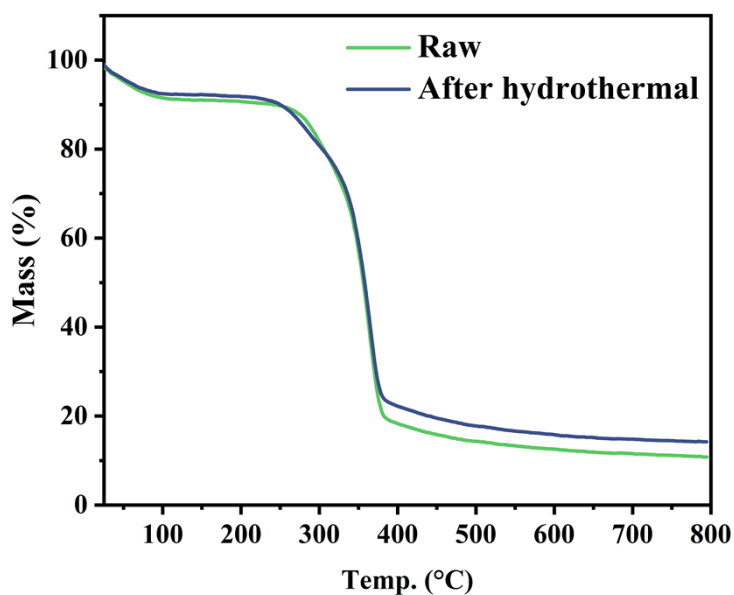

Fig.S1 The TG curves of fresh and hydrothermal treated loofah

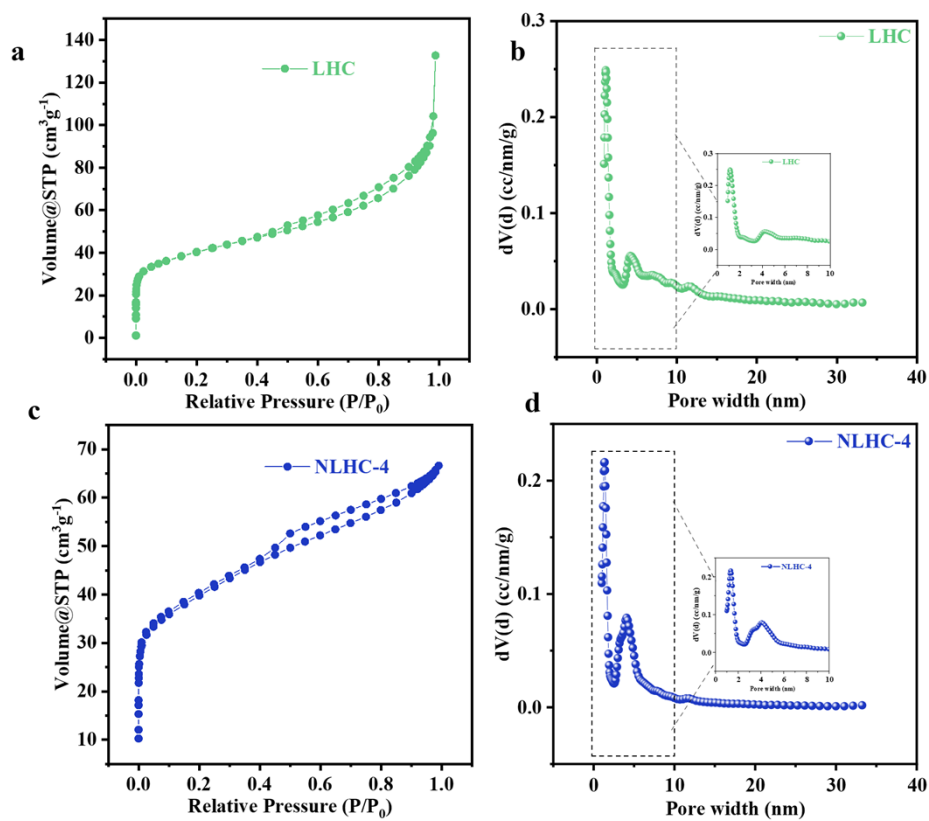

Fig.S2 the absorption and desorption curves of (a) LHC and (b) NLHC; the pore size distributions of (c) LHC and (d) NLHC

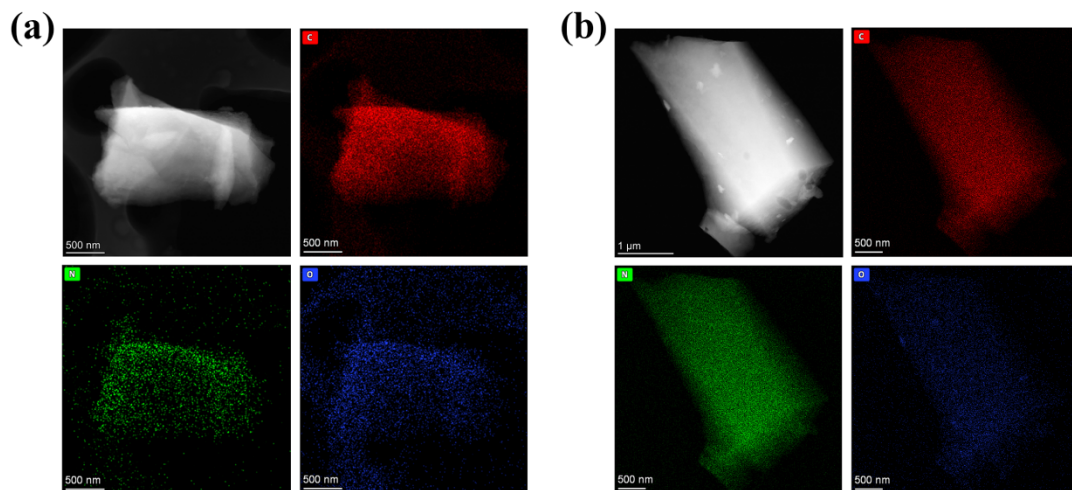

Fig.S3 the element distribution of (a) LHC and (b) NLHC

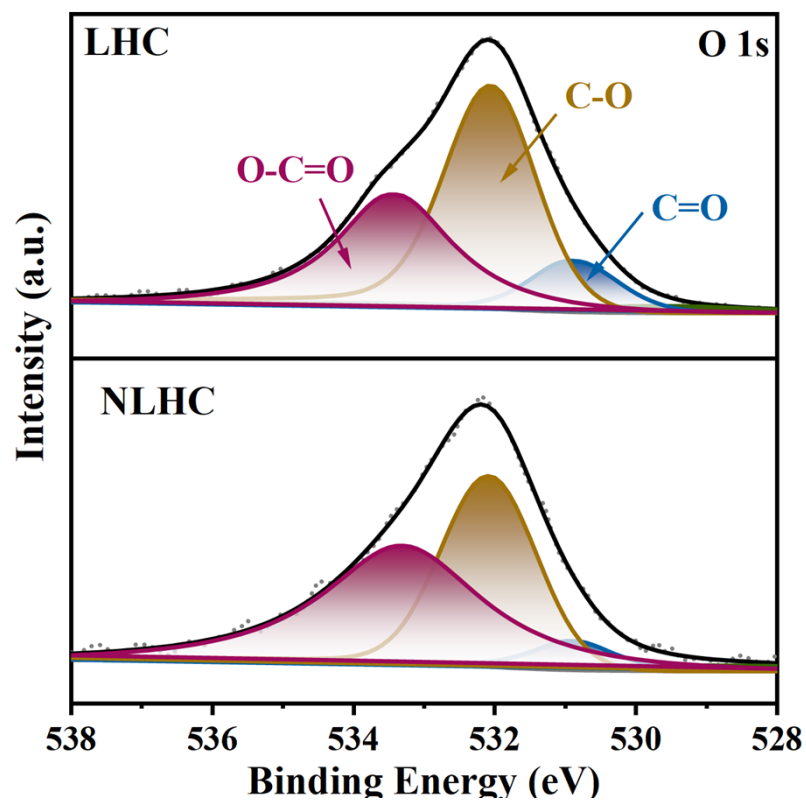

Fig.S4 O1s spectra of LHC and NLHC

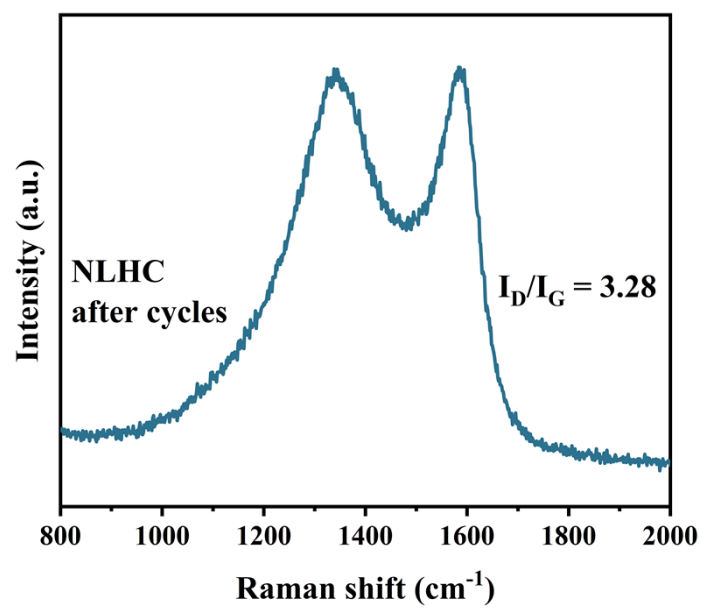

Fig.S5 the Raman of spectra of NLHC after cycling

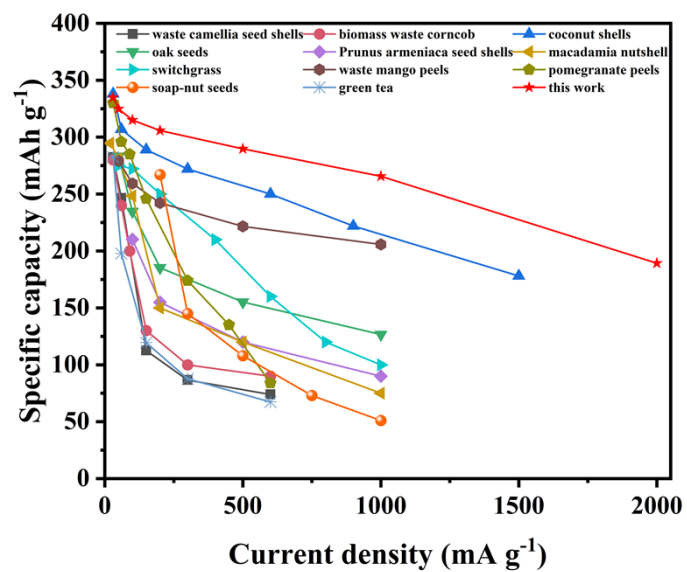

Fig.S6 Reported specific capacities of biomass-derived hard carbon materials for sodium-ion storage.

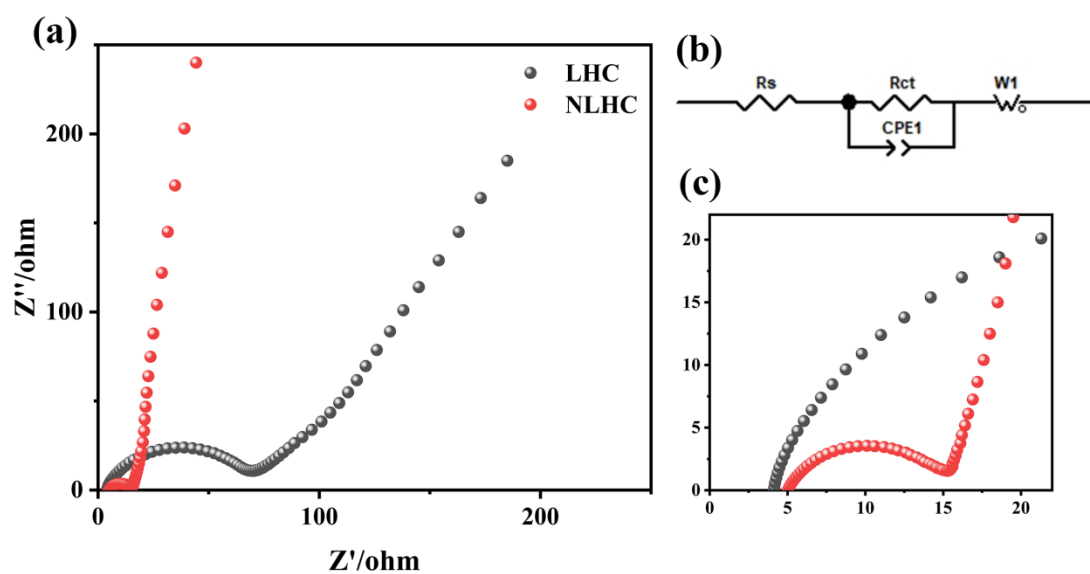

Fig. S7 the EIS curves of (a) LHC and NLHC; (b) the simulated circuit diagram; (c) enlarged EIS curves

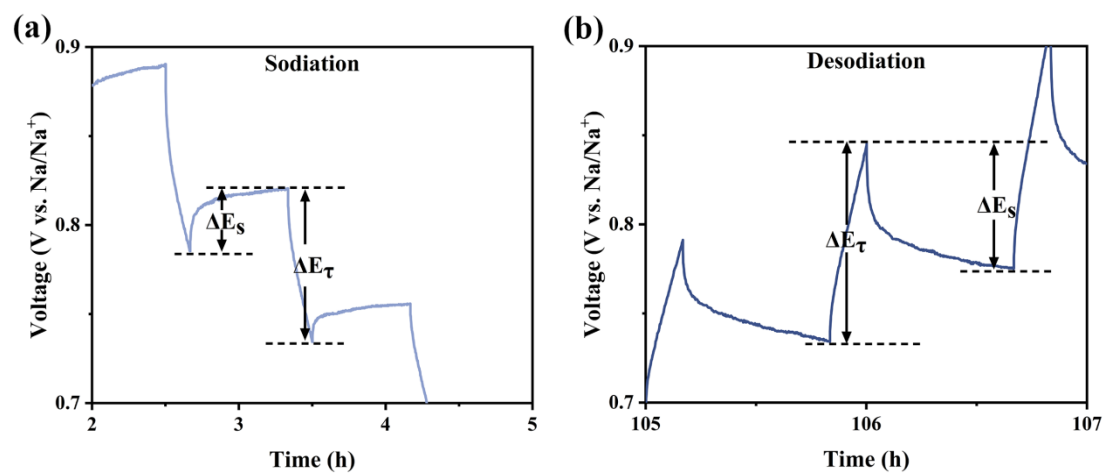

Fig. S8 the obtained  $\Delta E_S$  and  $\Delta E_\tau$  from GITT curves

Table S1 the impurity of K<sup>+</sup> and Ca<sup>2+</sup> ions in the carbon materials tested by ICP

|                  | LHC      | NLHC-2   | NLHC-3   | NLHC-4   | NLHC-6  |
|------------------|----------|----------|----------|----------|---------|
| K <sup>+</sup>   | 1340.785 | 1098.646 | 1074.834 | 924.305  | 905.694 |
| Ca <sup>2+</sup> | 35375.46 | 3969.183 | 2826.447 | 1720.256 | 820.673 |

Noted: (1) the unit is mg/Kg. (2) NLHC-X, the X means the concentration of NH<sub>4</sub>Cl is X mol/L.

Table S2 the surface element content of LHC and NLHC by EDS and total nitrogen content analysis

| Sample | C(at%) | O(at%) | N(at%)* | N(%) <sup>#</sup> |
|--------|--------|--------|---------|-------------------|
| LHC    | 93.09  | 6.55   | 0.36    | 0.39              |
| NLHC   | 90.18  | 8.96   | 0.86    | 0.47              |

Noted: \*tested by EDS. <sup>#</sup>tested by total nitrogen content analysis

Table S3. Sodium storage performance of previously reported biomass-derived hard carbon materials

| Precursor                  | Treatment                                                                                                                   | Carbonization                                          | Current density (mA g <sup>-1</sup> ) | Specific capacity (mAh g <sup>-1</sup> ) | ICE(%) | Ref. |
|----------------------------|-----------------------------------------------------------------------------------------------------------------------------|--------------------------------------------------------|---------------------------------------|------------------------------------------|--------|------|
| waste camellia seed shells | pre-carbonized at 600 °C for 2 h; immersed and stirred in 2 M HCl for 6 h                                                   | pyrolyzed at 1200, 1300 or 1400 °C for 2 h in Ar flow  | 30                                    | 282.4                                    | 80.1   | [1]  |
|                            |                                                                                                                             |                                                        | 60                                    | 246.5                                    |        |      |
|                            |                                                                                                                             |                                                        | 150                                   | 112.5                                    |        |      |
|                            |                                                                                                                             |                                                        | 300                                   | 86.6                                     |        |      |
|                            |                                                                                                                             |                                                        | 600                                   | 73.9                                     |        |      |
|                            |                                                                                                                             |                                                        | 30                                    | 270 after 200 cycles                     |        |      |
| biomass waste corncob      | carbonization at 500 °C for 2 h under an Ar airflow; treated successively with 2 M HCl, 2 M NaOH, and 5% HF; wash till pH=7 | heated to 1150, 1300, 1450 °C for 2 h under Ar airflow | 30                                    | 280                                      | 79.6   | [2]  |
|                            |                                                                                                                             |                                                        | 60                                    | 240                                      |        |      |
|                            |                                                                                                                             |                                                        | 90                                    | 200                                      |        |      |
|                            |                                                                                                                             |                                                        | 150                                   | 130                                      |        |      |
|                            |                                                                                                                             |                                                        | 300                                   | 100                                      |        |      |
|                            |                                                                                                                             |                                                        | 600                                   | 90                                       |        |      |
| coconut                    | carbonization at                                                                                                            | calcined at 300                                        | 30                                    | 250 after 100 cycles                     | 69.8   | [3]  |
|                            |                                                                                                                             |                                                        | 30                                    | 338                                      |        |      |



|                                    |                                                                                                                             |                                                                                   |      |                            |                 |     |
|------------------------------------|-----------------------------------------------------------------------------------------------------------------------------|-----------------------------------------------------------------------------------|------|----------------------------|-----------------|-----|
| shells                             | 1300 °C;<br>powder was<br>mixed<br>thoroughly with<br>urea by ball<br>milling at 300<br>rpm for 5 h                         | °C for 2 h in an<br>argon<br>atmosphere                                           | 60   | 307                        |                 |     |
|                                    |                                                                                                                             |                                                                                   | 150  | 289                        |                 |     |
|                                    |                                                                                                                             |                                                                                   | 300  | 272                        |                 |     |
|                                    |                                                                                                                             |                                                                                   | 600  | 250                        |                 |     |
|                                    |                                                                                                                             |                                                                                   | 900  | 222                        |                 |     |
|                                    |                                                                                                                             |                                                                                   | 1500 | 178                        |                 |     |
|                                    |                                                                                                                             |                                                                                   | 600  | 199 after 300 cycles       |                 |     |
| oak seeds                          | immersed in a<br>certain<br>concentration<br>of 15% HF for<br>12 h after<br>carbonization                                   | carbonization at<br>1300 °C for 6 h                                               | 50   | 283.2                      | less than<br>30 | [4] |
|                                    |                                                                                                                             |                                                                                   | 100  | 234.7                      |                 |     |
|                                    |                                                                                                                             |                                                                                   | 200  | 185.3                      |                 |     |
|                                    |                                                                                                                             |                                                                                   | 500  | 155.2                      |                 |     |
|                                    |                                                                                                                             |                                                                                   | 1000 | 126.7                      |                 |     |
|                                    |                                                                                                                             |                                                                                   | 1000 | 119.9 after 1000 cycles    |                 |     |
| Prunus<br>armeniaca<br>seed shells | pulverized to a<br>partical size of<br>74 µm                                                                                | carbonization at<br>1000, 1100 or<br>1200 °C for 5 h<br>under N <sub>2</sub> flow | 100  | 210.2                      | not<br>found    | [5] |
|                                    |                                                                                                                             |                                                                                   | 200  | about 155                  |                 |     |
|                                    |                                                                                                                             |                                                                                   | 500  | about 120                  |                 |     |
|                                    |                                                                                                                             |                                                                                   | 1000 | about 90                   |                 |     |
| macadamia<br>nutshell              | add macadamia<br>nutshell into a<br>solution of<br>lactic acid and<br>betaine; stirred<br>for hours;<br>washed and<br>dried | carbonization at<br>1100 °C for 2 h                                               | 20   | 294.78                     | 62.36           | [6] |
|                                    |                                                                                                                             |                                                                                   | 50   | 281.06                     |                 |     |
|                                    |                                                                                                                             |                                                                                   | 100  | 248.38                     |                 |     |
|                                    |                                                                                                                             |                                                                                   | 200  | about 150                  |                 |     |
|                                    |                                                                                                                             |                                                                                   | 500  | about 120                  |                 |     |
|                                    |                                                                                                                             |                                                                                   | 1000 | about 75                   |                 |     |
|                                    |                                                                                                                             |                                                                                   | 100  | below 250 after 200 cycles |                 |     |
| switchgrass                        | grind<br>switchgrass to<br>1mm powders;<br>hydrothermal<br>treatment at<br>220 °C for 12 h                                  | carbonized at<br>1600 °C                                                          | 50   | about 275                  | 84.8            | [7] |
|                                    |                                                                                                                             |                                                                                   | 100  | 272.2                      |                 |     |
|                                    |                                                                                                                             |                                                                                   | 200  | about 250                  |                 |     |
|                                    |                                                                                                                             |                                                                                   | 400  | about 210                  |                 |     |
|                                    |                                                                                                                             |                                                                                   | 600  | about 160                  |                 |     |
|                                    |                                                                                                                             |                                                                                   | 800  | about 120                  |                 |     |
|                                    |                                                                                                                             |                                                                                   | 1000 | under 100                  |                 |     |
|                                    |                                                                                                                             |                                                                                   | 100  | 308.4 after 100 cycles     |                 |     |
| waste<br>mango peels               | dried and<br>ground to<br>powders;                                                                                          | calcined at 1000<br>°C for 2 h                                                    | 50   | 279.13                     | 70.39           | [8] |
|                                    |                                                                                                                             |                                                                                   | 100  | 259.30                     |                 |     |

|                   |                                                                                                                                         |                                                           |      |                          |       |      |
|-------------------|-----------------------------------------------------------------------------------------------------------------------------------------|-----------------------------------------------------------|------|--------------------------|-------|------|
|                   | dispersed in deionized water;                                                                                                           |                                                           | 200  | 242.17                   |       |      |
|                   | hydrothermal treatment at 200 °C for 24 h;                                                                                              |                                                           | 500  | 221.63                   |       |      |
|                   | washed by 1 M HCl                                                                                                                       |                                                           | 1000 | 205.82                   |       |      |
|                   |                                                                                                                                         |                                                           | 1000 | 250.35 after 1000 cycles |       |      |
| pomegranate peels | washed by HCl and HF after carbonization                                                                                                | carbonized 900, 1000, 1100, 1200 or 1300 °C               | 30   | 330                      |       |      |
|                   |                                                                                                                                         |                                                           | 60   | 296                      |       |      |
|                   |                                                                                                                                         |                                                           | 90   | about 285                |       |      |
|                   |                                                                                                                                         |                                                           | 150  | 246                      | 44.8  | [9]  |
|                   |                                                                                                                                         |                                                           | 300  | 174                      |       |      |
|                   |                                                                                                                                         |                                                           | 450  | about 135                |       |      |
|                   |                                                                                                                                         |                                                           | 600  | 84                       |       |      |
|                   |                                                                                                                                         |                                                           | 150  | 175 after 200 cycles     |       |      |
| soap-nut seeds    | carbonized at 500 °C under N <sub>2</sub> ; planetary milling at 600 rpm for 8 h; washed by HCl and DI water; dried at 100 °C overnight | pyrolyzed at 600, 700, 800 or 900 °C under N <sub>2</sub> | 200  | 267                      |       |      |
|                   |                                                                                                                                         |                                                           | 300  | 145                      |       |      |
|                   |                                                                                                                                         |                                                           | 500  | 108                      | 26.79 | [10] |
|                   |                                                                                                                                         |                                                           | 750  | 73                       |       |      |
|                   |                                                                                                                                         |                                                           | 1000 | 51                       |       |      |
|                   |                                                                                                                                         |                                                           | 300  | 83 after 500 cycles      |       |      |
| green tea         | soaked in 100 °C DI water; dried; ground to powder; washed 1 M HCl for 5 h at 60 °C                                                     | carbonized at 1000, 1200, 1400 and 1600 °C                | 30   | 282.4                    |       |      |
|                   |                                                                                                                                         |                                                           | 60   | 197.7                    |       |      |
|                   |                                                                                                                                         |                                                           | 150  | 119.4                    | 69    | [11] |
|                   |                                                                                                                                         |                                                           | 300  | 87.7                     |       |      |
|                   |                                                                                                                                         |                                                           | 600  | 67.3                     |       |      |
|                   |                                                                                                                                         |                                                           | 100  | 205 after 100 cycles     |       |      |
| this work         | hydrothermal treatment in 4 M NH <sub>4</sub> Cl                                                                                        | carbonized at 1300 °C for 2 h under Ar gas                | 30   | 334.8                    |       |      |
|                   |                                                                                                                                         |                                                           | 50   | 324.9                    |       |      |
|                   |                                                                                                                                         |                                                           | 100  | 315                      |       |      |
|                   |                                                                                                                                         |                                                           | 200  | 305.8                    | 71.92 | /    |
|                   |                                                                                                                                         |                                                           | 500  | 289.8                    |       |      |
|                   |                                                                                                                                         |                                                           | 1000 | 265.7                    |       |      |
|                   |                                                                                                                                         |                                                           | 2000 | 189.2                    |       |      |

Table S4: Reported energy density or cycle performance of full cells of sodium-ion batteries based on hard carbon

| Precursor                                                                                                          | Cathode                                                     | energy density                                                          | Reference |
|--------------------------------------------------------------------------------------------------------------------|-------------------------------------------------------------|-------------------------------------------------------------------------|-----------|
| Porphyra                                                                                                           | $\text{Na}_3\text{V}_2(\text{PO}_4)_3@\text{C}$             | 69.4 mAh g <sup>-1</sup><br>at 100 mA g <sup>-1</sup> after 100 cycles  | [12]      |
| Hard carbon (Merck group)                                                                                          | $\text{Na}_3\text{V}_2(\text{PO}_4)_2\text{F}_3$            | 352.49 Wh kg <sup>-1</sup>                                              | [13]      |
| Spent Coffee Grounds                                                                                               | $\text{Na}_{0.44}\text{MnO}_2$                              | 440-490 Wh kg <sup>-1</sup>                                             | [14]      |
| Waste foam-derived carbon from waste tea, moroccan argan shells, jute silk waste, lotus stem and navel orange peel | $\text{Na}_3\text{V}_2(\text{PO}_4)_3$                      | 205.9 Wh kg <sup>-1</sup>                                               | [15]      |
| Corn starch                                                                                                        | $\text{Na}_3\text{V}_2(\text{PO}_4)_3$                      | 268.81 Wh kg <sup>-1</sup>                                              | [16]      |
| Corn stover                                                                                                        | $\text{NaNi}_{1/3}\text{Fe}_{1/3}\text{Mn}_{1/3}\text{O}_2$ | 118 mAh g <sup>-1</sup> at 80 mA g <sup>-1</sup>                        | [17]      |
| Waste <i>Camellia semiserrata</i> shell                                                                            | $\text{NaFe}_{1/3}\text{Ni}_{1/3}\text{Mn}_{1/3}\text{O}_2$ | 150 mAh g <sup>-1</sup> at 500 mA g <sup>-1</sup><br>after 100 cycles   | [18]      |
| Olive shells                                                                                                       | $\text{Na}_2\text{Fe}(\text{Fe}(\text{CN})_6)$              | 320 mAh g <sup>-1</sup> at 50 mA g <sup>-1</sup>                        | [19]      |
| Pomegranate peel                                                                                                   | $\text{Na}_3\text{V}_2(\text{PO}_4)_3$                      | 110 mAh g <sup>-1</sup> at 40 mA g <sup>-1</sup>                        | [20]      |
| This work                                                                                                          | $\text{Na}_3\text{V}_2(\text{PO}_4)_3$                      | 101.2 mAh g <sup>-1</sup> at 500 mA g <sup>-1</sup><br>after 200 cycles | /         |

## References

- [1] Peng J, Tan H, Tang Y, et al. The induced formation and regulation of closed-pore structure for biomass hard carbon as anode in sodium-ion batteries [J]. *Journal of Energy Storage*, 2024.
- [2] Tang Y, He J, Peng J, et al. Electrochemical Behavior of the Biomass Hard Carbon Derived from Waste Corncob as a Sodium-Ion Battery Anode [J]. *Energy & Fuels*, 2024.
- [3] Xiang J, Ma L, Sun Y, et al. Ball-Milling-Assisted N/O Codoping for Enhanced Sodium Storage Performance of Coconut-Shell-Derived Hard Carbon Anodes in Sodium-Ion Batteries [J]. *Langmuir*, 2024.
- [4] Ding J, Zhang Y, Huang Y, et al. Sulfur and phosphorus co-doped hard carbon derived from oak seeds enabled reversible sodium spheres filling and plating for ultra-stable sodium storage [J]. *Journal of Alloys and Compounds*, 2021.
- [5] Oktay Z M, Onal Y, Depci T, et al. Investigation of electrochemical performance of Na-ion batteries by hard carbon anodes produced by biomass of *Prunus armeniaca* seeds [J]. *Journal of Materials Science: Materials in Electronics*, 2023.
- [6] Wang Q, Du L, Wang S, et al. Biomass-Derived Hard Carbon Anodes Processed with Deep Eutectic Solvents for High-Performance Sodium-Ion Batteries [J]. *ACS Omega*, 2025.
- [7] Li Y, Xia D, Tao L, et al. Hydrothermally Assisted Conversion of Switchgrass into Hard Carbon as Anode Materials for Sodium-Ion Batteries [J]. *ACS Applied Materials & Interfaces*, 2024.
- [8] Liu J, Zhang Z, Yin Y, et al. A mango peel-derived hard carbon as high-performance anode material for sodium-ion batteries [J]. *Journal of Industrial and Engineering Chemistry*, 2025.
- [9] Wu Q, Shu K, Zhao L, et al. Pomegranate Peel-Derived Hard Carbons as Anode Materials for Sodium-Ion Batteries [J/OL] 2024, 29(19).
- [10] Khatua S, Achary K R, Rao Y B, et al. Physicochemical activation of soap-nut seeds-derived hard carbon as a sustainable anode for lithium-ion batteries [J]. *New Journal of Chemistry*, 2024.
- [11] Pei L, Cao H, Yang L, et al. Hard carbon derived from waste tea biomass as high-performance anode material for sodium-ion batteries [J]. *Ionics*, 2020.
- [12] Hu X, Fan X, Mou Z, et al. Controlled synthesis of multi-doped highly-disordered porous biomass carbon microsphere for ultra-stable and fast sodium storage [J]. *Journal of Energy Storage*, 2024.
- [13] Mahato S, Das A, Biswas K. Experimental and theoretical investigation on boron, phosphorus dual doped hard carbon as anode for sodium-ion battery [J]. *Journal of Energy Storage*, 2024.
- [14] Pianta N, Florenzano D A, Lorenzi R, et al. Hard Carbon Derived from Spent Coffee Grounds for Applications in Sodium Ions Batteries [J]. *Advanced Sustainable Systems*, 2025.
- [15] Chen Y, Sun H, He X X, et al. Pre-Oxidation Strategy Transforming Waste Foam to Hard Carbon Anodes for Boosting Sodium Storage Performance [J]. *Small*, 2023.
- [16] Zhong H, Huang Q, Zou M, et al. From food to hard carbon: Citric acid enhanced biomass-derived anodes for high-performance sodium storage [J]. *Chemical Engineering Journal*, 2025.
- [17] Wang Y, Li M, Zhang Y, et al. Defect-rich hard carbon designed by heteroatom escape assists sodium storage performance for sodium-ion batteries [J]. *Chemical Engineering Journal*, 2024.
- [18] Huang J, Zhang Q, Yuan M, et al. A distinctive edge-graphited hard carbon for advanced sodium-ion batteries [J]. *Journal of Materials Chemistry A*, 2025.
- [19] Zhou L, Cui Y, Niu P, et al. Biomass-derived hard carbon material for high-capacity sodium-ion battery anode through structure regulation [J]. *Carbon*, 2025.

- [20] Wu Q, Shu K, Zhao L, et al. Pomegranate Peel-Derived Hard Carbons as Anode Materials for Sodium-Ion Batteries [J]. *Molecules*, 2024.
